# Supplementary material for: Influence of Aluminium and EGCG on Fibrillation and Aggregation of Human Islet Amyloid Polypeptide
Source: Hindawi journal article supplement (doi:10.1155/2016/1867059), 2016-01-01
Supplement: f1 [file 1867059.f1.pdf]

## Graphical abstracts for Table of Contents

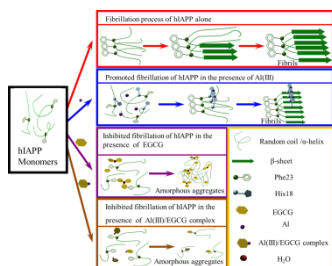

hIAPP monomers self-assemble into fibrils. EGCG efficiently inhibits this process, and even can inhibit Al(III)-induced fibrillation via Al(III)/EGCG complex of Al(EGCG)(H<sub>2</sub>O)<sub>2</sub>.

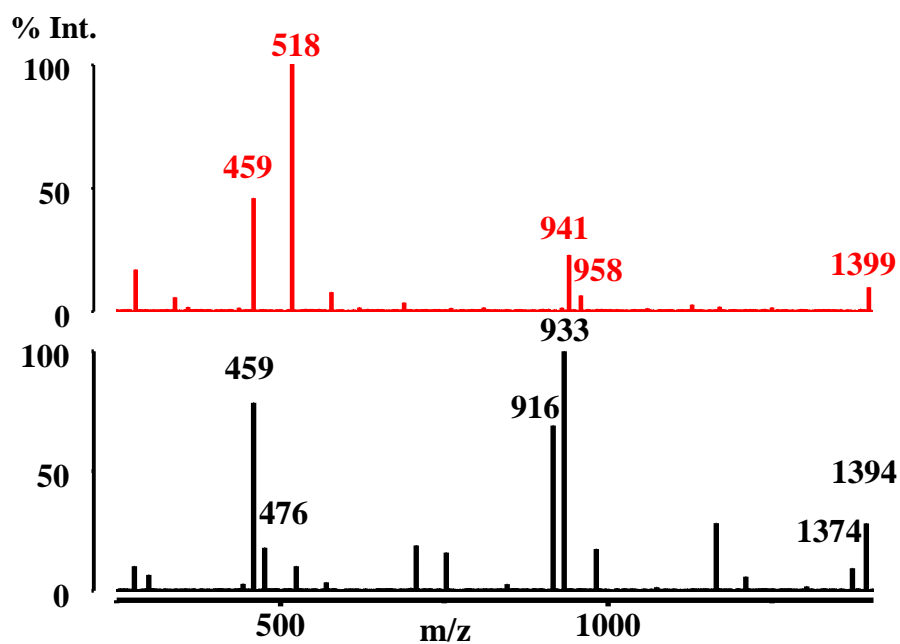

**Fig. S1** ESI mass spectra of 10 mM EGCG without (bottom) and with (top) 10 mM Al(III).

**Table S1** Assignments of ESI mass spectra of EGCG and Al(III)/EGCG complex<sup>a</sup>

| EGCG |                                 | Al(III)/EGCG |                                                                  |
|------|---------------------------------|--------------|------------------------------------------------------------------|
| m/z  | ion                             | m/z          | ion                                                              |
| 459  | H <sup>+</sup> E                | 459          | H <sup>+</sup> E                                                 |
| 476  | H <sup>+</sup> EW               | 518          | Al <sup>3+</sup> (H <sup>+</sup> ) <sub>2</sub> EW <sub>2</sub>  |
| 916  | H <sup>+</sup> E <sub>2</sub>   | 941          | Al <sup>3+</sup> (H <sup>+</sup> ) <sub>2</sub> E                |
| 933  | H <sup>+</sup> E <sub>2</sub> W | 958          | Al <sup>3+</sup> (H <sup>+</sup> ) <sub>2</sub> E <sub>2</sub> W |
| 1374 | H <sup>+</sup> E <sub>3</sub>   | 1399         | Al <sup>3+</sup> (H <sup>+</sup> ) <sub>2</sub> E <sub>3</sub>   |
| 1394 | Na <sup>+</sup> E <sub>3</sub>  |              |                                                                  |

<sup>a</sup>E and W represent EGCG and water, respectively.

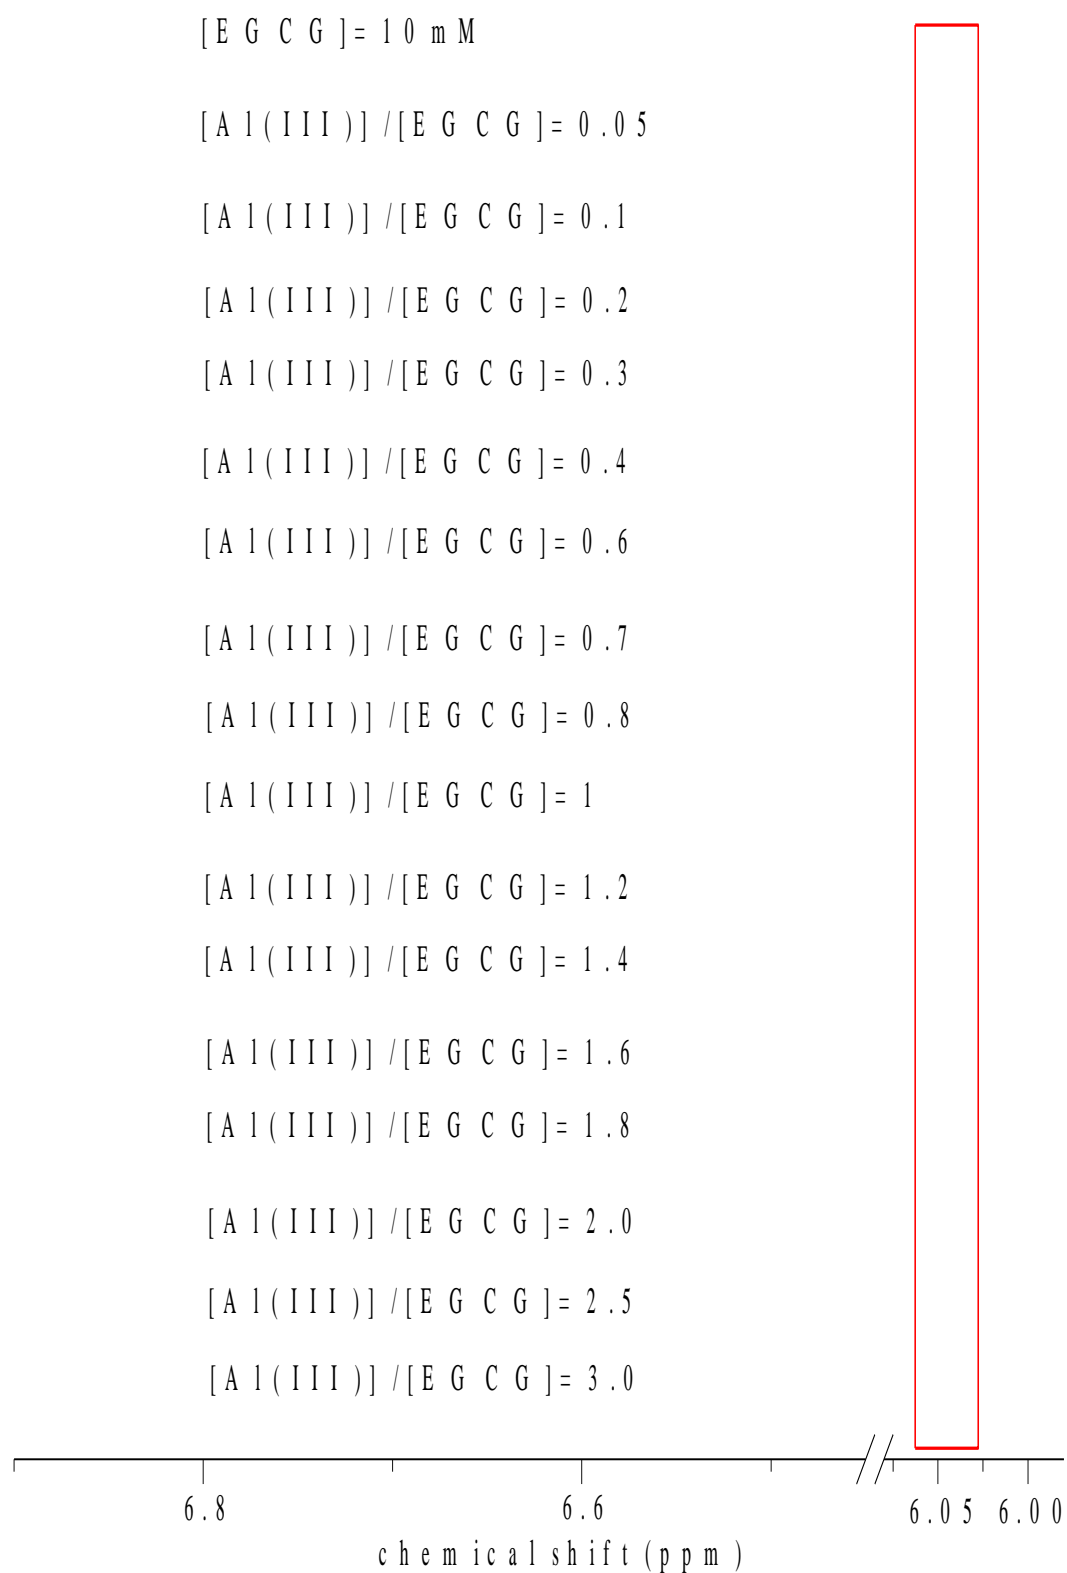

**Fig. S2**  $^1\text{H}$  NMR spectra of 10 mM EGCG in the presence of Al(III) at various concentrations from 0 to 30 mM. Intensity of peak at 6.04 ppm decreased with the titration of Al(III)

**Table S2** Assignments of <sup>1</sup>H NMR spectra of EGCG and Al(III)/EGCG complex

| EGCG      |                 | Al(III)/EGCG |                 |
|-----------|-----------------|--------------|-----------------|
| δ (ppm)   | sites           | δ (ppm)      | sites           |
| 6.92      | H-3'' and H-7'' | 6.92         | H-3'' and H-7'' |
| 6.50      | H-2' and H-6'   | 6.80         | H-3'' and H-7'' |
| 6.04      | H-9             | 6.75         | H-3'' and H-7'' |
| 6.02      | H-7             | 6.55         | H-2' and H-6'   |
| 2.77-2.95 | H-4             | 6.50         | H-2' and H-6'   |
|           |                 | 6.04         | H-9             |
|           |                 | 6.02         | H-7             |
|           |                 | 2.77-2.95    | H-4             |

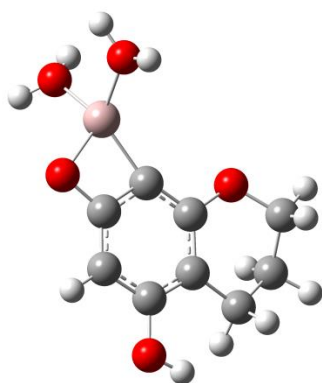

Charge = 1 Multiplicity = 1

E = -968.4423424 a.u.

C,-0.1181060603,2.1513427975,-0.0761798716  
C,1.1964183484,1.7077932861,0.096382481  
C,1.5739730081,0.3543043861,0.0429043402  
C,0.5682708294,-0.5848548203,-0.2474120686  
C,-0.7583133057,-0.2026944057,-0.4224441353  
C,-1.0653646855,1.1686730201,-0.3214829309  
H,3.6535359534,0.2034691085,-0.5089617051  
C,2.9980612017,-0.0702527748,0.3283608391  
C,2.2279917488,-2.2828294358,-0.4832676421  
C,3.0660032715,-1.578054723,0.5621777369  
O,0.843520921,-1.923981861,-0.3530032769  
O,-2.4249333279,1.4117788893,-0.5104260233  
O,2.1286540332,2.6830762872,0.3382399529  
H,2.2531926805,-3.3676042206,-0.3742924697  
H,3.3756697241,0.4535457055,1.2150146398  
H,2.6774186639,-1.8288484641,1.5555297944  
H,2.5624825656,-2.016483989,-1.4944304268  
H,4.0982594212,-1.9327814485,0.5045519248  
Al,-2.627016425,-0.3554541736,-0.7392537585  
O,-3.9441865127,-1.0288009635,0.3403076343  
H,-4.1068416981,-0.7096886745,1.2456787169  
H,-4.3187951448,-1.9231722715,0.2464935676  
H,3.021088199,2.3102327446,0.3799425566  
H,-0.363286278,3.2061124546,-0.0202690067  
O,-3.3891032752,-0.9734982513,-2.2820707995  
H,-4.341877662,-1.1434046105,-2.3927253665  
H,-2.9578618248,-0.980767582,-3.154668793

**Fig. S3** Geometries and Cartesian coordinates of AE-1. Red, gray, pink and white balls represent oxygen, carbon, aluminum and hydrogen atoms respectively.

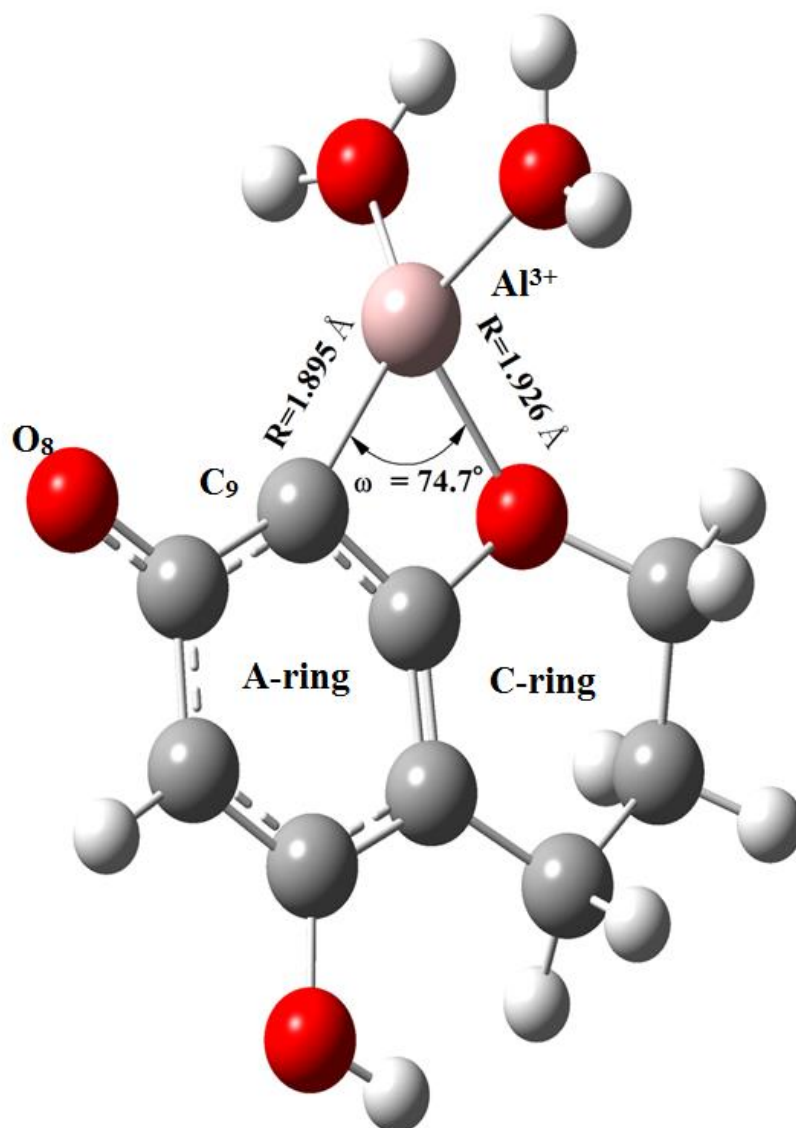

**Fig. S4** Illustration of Al(EGCG)(H<sub>2</sub>O)<sub>2</sub> complex 2 (AE-2). Red, gray, pink and white balls represent oxygen, carbon, aluminum and hydrogen atoms respectively. C<sub>9</sub> in A-ring and O atom in C-ring of EGCG form coordination bonds with aluminum.

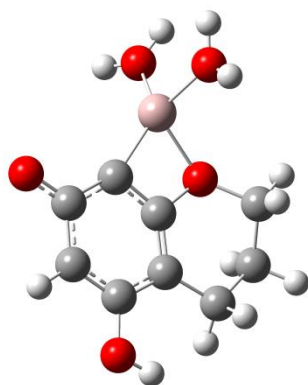

Charge = 1 Multiplicity = 1

E = -968.3992056 a.u.

C,-0.1387796648,2.1889338773,-0.0915244703  
C,1.1774264082,1.7631186043,0.0218812299  
C,1.5499330747,0.3976712855,0.0508439402  
C,0.4563696685,-0.4266533516,-0.0626062979  
C,-0.8925276905,-0.1066651385,-0.2113388868  
C,-1.2397889819,1.2795877355,-0.2195223471  
H,3.4810379674,0.0527749036,-0.8226810872  
C,2.9584256309,-0.1417861217,0.1226397912  
C,1.9086432475,-2.3689674212,-0.4422924512  
C,2.9440132017,-1.6510219872,0.4010121601  
O,0.595094082,-1.8531038364,-0.0617569802  
O,-2.4536615418,1.6988182968,-0.3455598254  
O,2.1384921672,2.7401748552,0.1015333835  
H,1.8643124215,-3.4382171675,-0.2430427832  
H,3.5287851114,0.3605832391,0.9122827913  
H,2.7208466793,-1.8408622068,1.4560186488  
H,2.0335051364,-2.1814336538,-1.5126886141  
H,3.9226447903,-2.0861985379,0.1835509507  
Al,-1.2629243899,-1.9427744117,-0.4187007024  
O,-2.1628969011,-3.0457707769,0.7038461705  
H,-2.556627032,-2.7641134705,1.5496550443  
H,-2.3029113918,-4.0029289755,0.5830211464  
H,3.0215348912,2.3503888179,0.1791242189  
H,-0.3382069706,3.2567102977,-0.1026325722  
O,-1.4646073375,-2.9486355657,-1.9187252427  
H,-2.1267345359,-3.654806384,-2.0340297329  
H,-1.0776575604,-2.724613416,-2.7847629821

**Fig. S5** Geometries and Cartesian coordinates of AE-2. Red, gray, pink and white balls represent oxygen, carbon, aluminum and hydrogen atoms respectively.

**Table S3** Binding free energies and their components from quantum chemical calculations for Al(III)/EGCG complexes (a.u.)

| Contributions                         | AE-1    | AE-2    |
|---------------------------------------|---------|---------|
| $G_{(\text{complex})}$                | -968.27 | -968.23 |
| $G_{(\text{H}^+)}$                    | -0.23   | -0.23   |
| $G_{(\text{Al}^{3+})}$                | -241.40 | -241.40 |
| $G_{(\text{EGCG}\cdot\text{H}_{11})}$ | -573.86 | -573.86 |
| $G_{(\text{H}_2\text{O})}$            | -76.41  | -76.41  |
| $\Delta G_{\text{binding}}$           | -0.43   | -0.39   |

**Table S4** Fibrillation kinetic parameters of hIAPP on Al(III) concentration by ThT fluorescence assay

| [Al] ( $\mu\text{M}$ ) | $I_{\text{max}}$ (A.U.) | $t_{1/2}$ (min) | $k$ ( $\text{min}^{-1}$ ) | $t_0$ (min)    | R     |
|------------------------|-------------------------|-----------------|---------------------------|----------------|-------|
| 0                      | 211.5 $\pm$ 1.3         | 20.8 $\pm$ 0.2  | 0.278 $\pm$ 0.016         | 13.6 $\pm$ 0.5 | 0.985 |
| 2                      | 186.1 $\pm$ 1.1         | 17.2 $\pm$ 0.2  | 0.274 $\pm$ 0.015         | 9.9 $\pm$ 0.5  | 0.984 |
| 8                      | 180.5 $\pm$ 0.6         | 16.4 $\pm$ 0.1  | 0.239 $\pm$ 0.006         | 8.0 $\pm$ 0.3  | 0.997 |
| 64                     | 197.4 $\pm$ 0.9         | 14.0 $\pm$ 0.2  | 0.199 $\pm$ 0.007         | 4.0 $\pm$ 0.4  | 0.987 |



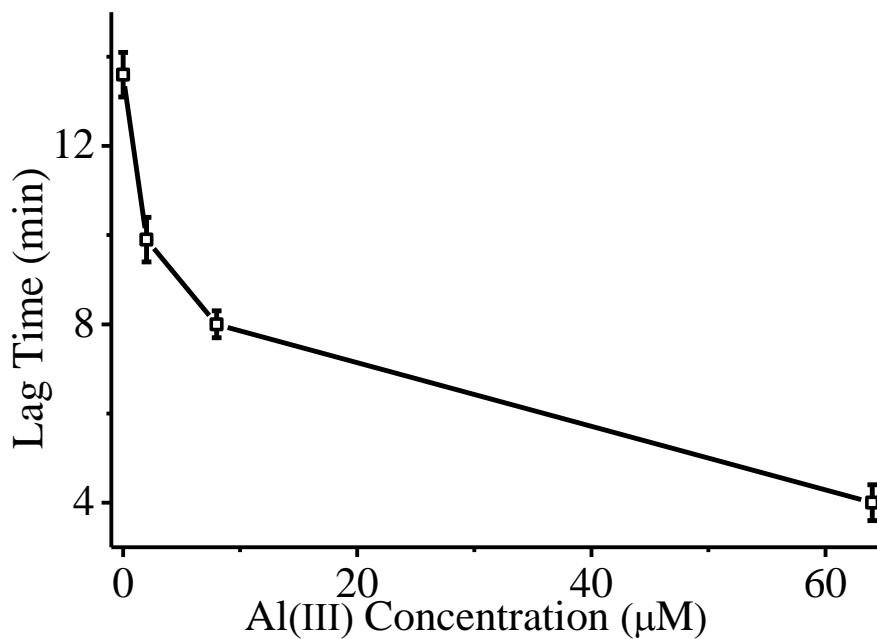

**Fig. S6** Lag time ( $t_0$ ) of 16  $\mu\text{M}$  hIAPP fibrillation on Al(III) concentration

**Table S5** Aggregation kinetic parameters of hIAPP with and without Al(III) by  $^1\text{H}$  NMR

| [Al] ( $\mu\text{M}$ ) | $I_{\text{max}}$ | $t_{1/2}$ (min) | $k$ ( $\text{min}^{-1}$ ) | $t_0$ (min) | R     |
|------------------------|------------------|-----------------|---------------------------|-------------|-------|
| 0                      | $0.98 \pm 0.01$  | $87.3 \pm 0.7$  | $0.106 \pm 0.007$         | $69 \pm 1$  | 0.992 |
| 12.5                   | $0.93 \pm 0.02$  | $84.0 \pm 1.1$  | $0.114 \pm 0.012$         | $66 \pm 2$  | 0.983 |

**Table S6** Assignments of  $^1\text{H}$  NMR spectra of aromatic resonances of hIAPP

| $\delta$ (ppm) | residues | sites        |
|----------------|----------|--------------|
| 7.24-7.28      | Phe15/23 | H $\epsilon$ |
| 7.21-7.24      | Phe15/23 | H $\delta$   |
| 7.17-7.21      | His18    | H $\delta$   |
| 7.11-7.17      | Phe15/23 | H $\zeta$    |
| 7.00-7.02      | Tyr37    | H $\epsilon$ |
| 6.71-6.73      | Tyr37    | H $\delta$   |

**Table S7** Fibrillation kinetic parameters of hIAPP on EGCG concentration by ThT fluorescence assay

| [EGCG] ( $\mu\text{M}$ ) | $I_{\text{max}}$ (A.U.) | $t_{1/2}$ (min) | $k(\text{min}^{-1})$ | $t_0$ (min)    | R     |
|--------------------------|-------------------------|-----------------|----------------------|----------------|-------|
| 0                        | 186.9 $\pm$ 3.1         | 23.0 $\pm$ 0.9  | 0.122 $\pm$ 0.004    | 6.6 $\pm$ 1.8  | 0.983 |
| 2                        | 136.0 $\pm$ 3.0         | 39.6 $\pm$ 1.1  | 0.069 $\pm$ 0.004    | 10.5 $\pm$ 2.0 | 0.995 |
| 8                        | 101.0 $\pm$ 0.9         | 38.4 $\pm$ 0.4  | 0.102 $\pm$ 0.003    | 18.7 $\pm$ 0.8 | 0.995 |
| 16                       | 69.8 $\pm$ 0.5          | 35.3 $\pm$ 0.4  | 0.113 $\pm$ 0.004    | 17.6 $\pm$ 0.7 | 0.986 |
| 32                       | 42.2 $\pm$ 0.4          | 23.4 $\pm$ 0.4  | 0.169 $\pm$ 0.010    | 11.6 $\pm$ 0.8 | 0.986 |

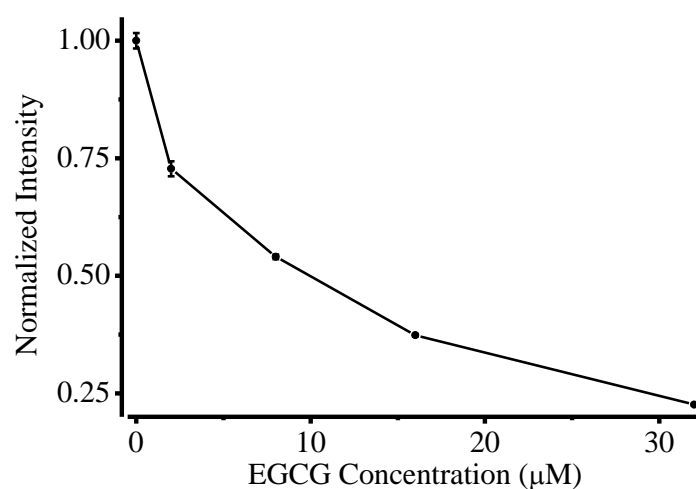

**Fig. S7** The maximum ThT fluorescence intensity ( $I_{\text{max}}$ ) of 16  $\mu\text{M}$  hIAPP on EGCG concentration. The intensity values were normalized to the hIAPP alone data.

**Table S8** Aggregation kinetic parameters of hIAPP with and without EGCG by  $^1\text{H}$  NMR

| [EGCG] ( $\mu\text{M}$ ) | $I_{\text{max}}$ | $t_{1/2}$ (min) | $k(\text{min}^{-1})$ | $t_0$ (min) |
|--------------------------|------------------|-----------------|----------------------|-------------|
| 0                        | 0.98 $\pm$ 0.01  | 87.3 $\pm$ 0.7  | 0.106 $\pm$ 0.007    | 69 $\pm$ 1  |
| 12.5                     | 1.06 $\pm$ 0.01  | 113.2 $\pm$ 1.1 | 0.051 $\pm$ 0.003    | 74 $\pm$ 2  |

**Table S9**  $^1\text{H}$  NMR peak line width at half maximum height ( $W_{1/2}$ ) of EGCG on molar ratio of [hIAPP]/[EGCG]

| [hIAPP]/[EGCG] | $W_{1/2}$ (Hz) |          |
|----------------|----------------|----------|
|                | 6.92 ppm       | 6.50 ppm |
| 0              | 0.6            | 1.28     |
| 0.02           | 1.48           | 1.88     |
| 0.1            | 2.26           | 2.6      |

**Table S10** Fibrillation kinetic parameters of 16  $\mu\text{M}$  hIAPP with 2  $\mu\text{M}$  EGCG on Al(III) concentration by ThT fluorescence assay

| [Al] ( $\mu\text{M}$ ) | $I_{\text{max}}$ (A.U.) | $t_{1/2}$ (min) | $k$ ( $\text{min}^{-1}$ ) | $t_0$ (min)    |
|------------------------|-------------------------|-----------------|---------------------------|----------------|
| 0                      | 106.1 $\pm$ 0.6         | 52.9 $\pm$ 0.3  | 0.100 $\pm$ 0.002         | 32.9 $\pm$ 0.6 |
| 1                      | 102.9 $\pm$ 0.6         | 69.3 $\pm$ 0.3  | 0.092 $\pm$ 0.002         | 47.7 $\pm$ 0.5 |
| 2                      | 97.6 $\pm$ 0.8          | 70.3 $\pm$ 0.4  | 0.082 $\pm$ 0.002         | 45.9 $\pm$ 0.7 |
| 4                      | 116.6 $\pm$ 0.8         | 62.3 $\pm$ 0.4  | 0.092 $\pm$ 0.002         | 40.5 $\pm$ 0.7 |
| 16                     | 117.5 $\pm$ 0.7         | 44.4 $\pm$ 0.3  | 0.114 $\pm$ 0.004         | 26.9 $\pm$ 0.7 |
| 64                     | 129.4 $\pm$ 0.5         | 31.9 $\pm$ 0.2  | 0.156 $\pm$ 0.004         | 19.1 $\pm$ 0.4 |

**Table S11** Nucleation kinetic parameters of hIAPP by DLS assay

| hIAPP co-incubated compounds       | $D_0$ (nm)     | $k$            | $n$             |
|------------------------------------|----------------|----------------|-----------------|
| -                                  | 34.9 $\pm$ 8.5 | 9.4 $\pm$ 0.7  | 1.56 $\pm$ 0.15 |
| 2 $\mu\text{M}$ EGCG               | 12.8 $\pm$ 4.4 | 31.9 $\pm$ 1.4 | 1.11 $\pm$ 0.06 |
| 2 $\mu\text{M}$ Al(III)            | 18.8 $\pm$ 7.2 | 19.5 $\pm$ 0.8 | 1.44 $\pm$ 0.08 |
| 2 $\mu\text{M}$ Al(III)/EGCG (1:1) | 20.2 $\pm$ 7.5 | 43.8 $\pm$ 2.0 | 1.17 $\pm$ 0.05 |
